# Supplementary material for: Human DNA polymerase delta is a pentameric holoenzyme with a dimeric p12 subunit
Source: Life Sci Alliance. 2019 Mar 18;2(2):e201900323. doi: 10.26508/lsa.201900323 (PMC6424025; doi:10.26508/lsa.201900323)
Supplement: Supplementary file 6 [file LSA-2019-00323_SdataF5B.xlsx]

## Sheet: Sheet1
Wavelength	p12	P12 RKR 3,4,5 AAA
260	0.337886	0.157381
259	0.19119	-0.14683
258	0.183875	0.338525
257	0.030319	-0.06115
256	0.1394	0.074288
255	0.385981	0.057201
254	0.400463	0.219201
253	0.283458	0.365913
252	0.246021	0.219915
251	0.379053	0.521514
250	0.0423113	0.072636
249	0.356333	0.297338
248	0.071884	0.234157
247	-0.182203	-0.17193
246	0.192387	0.06982
245	0.0719567	0.020353
244	-0.259487	-0.22454
243	-0.471083	-0.62633
242	-0.284937	-0.21691
241	-0.616377	-0.62154
240	-0.96901	-0.85277
239	-1.19748	-1.10283
238	-1.47649	-1.33385
237	-1.48784	-1.59109
236	-2.07683	-2.01081
235	-2.48335	-2.40194
234	-2.96287	-3.0658
233	-3.25708	-3.21772
232	-3.72181	-3.74985
231	-3.9434	-4.06529
230	-4.68942	-4.70617
229	-5.16148	-5.14288
228	-5.63755	-5.62716
227	-5.90482	-6.17107
226	-6.42719	-6.60746
225	-7.0115	-7.20563
224	-7.20408	-7.42761
223	-7.54076	-7.86306
222	-7.53546	-8.1645
221	-7.69453	-8.467
220	-7.62583	-8.39553
219	-8.01185	-8.51702
218	-8.12117	-8.26221
217	-7.90442	-8.11812
216	-7.99257	-8.38927
215	-7.94982	-8.42199
214	-7.94099	-8.39839
213	-7.81371	-8.44677
212	-8.5426	-8.36156
211	-8.97114	-9.05161
210	-7.97519	-7.62324
209	-5.81371	-5.82398
208	-5.5426	-5.64619
207	-5.97114	-5.00757
206	-4.97519	-4.78939
205	-4.18225	-4.89472
204	1.06612	-0.23929
203	1.52404	-0.27738
202	1.50598	-0.43191
201	1.61867	-0.40145
200	1.62468	-0.42162
